# Supplementary material for: Antioxidant Responses and Phytochemical Accumulation in Raphanus Species Sprouts through Elicitors and Predictive Models under High Temperature Stress
Source: MDPI journal article supplement (doi:10.3390/antiox13030333), 2024-03-08
Supplement: s1 [file s1]

# Antioxidant Responses and Phytochemical Accumulation in Raphanus Species Sprouts through Elicitors and Predictive Models under High Temperature Stress

María-Trinidad Toro <sup>1</sup>, Roberto Fustos <sup>2</sup>, Jaime Ortiz <sup>3</sup>, José Becerra <sup>4</sup>, Nelson Zapata <sup>5</sup>, María-Dolores López <sup>5\*</sup>

<sup>1</sup> School of Nutrition and Dietetics, Faculty of Medicine and Health Sciences, Universidad Mayor, Temuco, Chile; maria.toror@umayor.cl

<sup>2</sup> Department of Metallurgical Engineering, Faculty of Engineering, Universidad de Concepción, Concepción, Chile; robertofustos@udec.cl.

<sup>3</sup> Department of Food Science and Chemical Technology, Faculty of Chemical and Pharmaceutical Sciences, University of Chile, Santiago, Chile; jaortiz@uchile.cl.

<sup>4</sup> Department of Botany, Faculty of Natural and Oceanographic Sciences, University of Concepción, Natural Products Chemistry Laboratory, Concepción, Chile; jbecerra@udec.cl

<sup>5</sup> Department of Plant Production, Faculty of Agronomy, Universidad de Concepción, Chillán, Chile, nzpata@udec.cl; mlopezb@udec.cl.

\* Correspondence: mlopezb@udec.cl; Tel.: +56-412661456.

## Supplementary Materials

**Table S1.** Root Development in Edible Radish and Wild Radish Sprouts Over a 7-Day Sprouting Period.

| <i>Edible radish</i>           |     |                     |                                |     |                     |
|--------------------------------|-----|---------------------|--------------------------------|-----|---------------------|
| 20°C                           |     |                     | 28°C                           |     |                     |
| Elicitor                       | Day | Radicle length (cm) | Elicitor                       | Day | Radicle length (cm) |
| Control                        | 1   | 0.883               | Control                        | 1   | 0.650               |
| Control                        | 1   | 0.655               | Control                        | 1   | 0.578               |
| Control                        | 1   | 0.786               | Control                        | 1   | 0.544               |
| Citric Acid                    | 1   | 0.567               | Citric Acid                    | 1   | 0.58                |
| Citric Acid                    | 1   | 0.542               | Citric Acid                    | 1   | 0.796               |
| Citric Acid                    | 1   | 0.489               | Citric Acid                    | 1   | 0.871               |
| MeJa                           | 1   | 0.387               | MeJa                           | 1   | 0.642               |
| MeJa                           | 1   | 0.607               | MeJa                           | 1   | 0.523               |
| MeJa                           | 1   | 0.599               | MeJa                           | 1   | 0.589               |
| Chitosan                       | 1   | 0.482               | Chitosan                       | 1   | 0.482               |
| Chitosan                       | 1   | 0.392               | Chitosan                       | 1   | 0.495               |
| Chitosan                       | 1   | 0.554               | Chitosan                       | 1   | 0.590               |
| K <sub>2</sub> SO <sub>4</sub> | 1   | 0.733               | K <sub>2</sub> SO <sub>4</sub> | 1   | 0.612               |
| K <sub>2</sub> SO <sub>4</sub> | 1   | 0.835               | K <sub>2</sub> SO <sub>4</sub> | 1   | 0.633               |

|                                |   |       |                                |   |       |
|--------------------------------|---|-------|--------------------------------|---|-------|
| K <sub>2</sub> SO <sub>4</sub> | 1 | 0.872 | K <sub>2</sub> SO <sub>4</sub> | 1 | 0.714 |
| Control                        | 2 | 1.235 | Control                        | 2 | 2.245 |
| Control                        | 2 | 1.123 | Control                        | 2 | 2.550 |
| Control                        | 2 | 1.282 | Control                        | 2 | 2.322 |
| Citric Acid                    | 2 | 1.243 | Citric Acid                    | 2 | 2.044 |
| Citric Acid                    | 2 | 1.145 | Citric Acid                    | 2 | 1.581 |
| Citric Acid                    | 2 | 1.163 | Citric Acid                    | 2 | 2.179 |
| MeJa                           | 2 | 0.968 | MeJa                           | 2 | 2.164 |
| MeJa                           | 2 | 1.396 | MeJa                           | 2 | 1.258 |
| MeJa                           | 2 | 1.215 | MeJa                           | 2 | 1.160 |
| Chitosan                       | 2 | 0.603 | Chitosan                       | 2 | 2.703 |
| Chitosan                       | 2 | 0.776 | Chitosan                       | 2 | 2.785 |
| Chitosan                       | 2 | 0.772 | Chitosan                       | 2 | 2.655 |
| K <sub>2</sub> SO <sub>4</sub> | 2 | 1.584 | K <sub>2</sub> SO <sub>4</sub> | 2 | 2.326 |
| K <sub>2</sub> SO <sub>4</sub> | 2 | 1.509 | K <sub>2</sub> SO <sub>4</sub> | 2 | 1.945 |
| K <sub>2</sub> SO <sub>4</sub> | 2 | 2.033 | K <sub>2</sub> SO <sub>4</sub> | 2 | 2.012 |
| Control                        | 3 | 1.650 | Control                        | 3 | 3.533 |
| Control                        | 3 | 1.583 | Control                        | 3 | 3.680 |
| Control                        | 3 | 1.575 | Control                        | 3 | 3.744 |
| Citric Acid                    | 3 | 2.255 | Citric Acid                    | 3 | 2.842 |
| Citric Acid                    | 3 | 2.773 | Citric Acid                    | 3 | 2.800 |
| Citric Acid                    | 3 | 2.687 | Citric Acid                    | 3 | 3.077 |
| MeJa                           | 3 | 1.032 | MeJa                           | 3 | 2.378 |
| MeJa                           | 3 | 1.181 | MeJa                           | 3 | 2.271 |
| MeJa                           | 3 | 1.103 | MeJa                           | 3 | 2.377 |
| Chitosan                       | 3 | 0.931 | Chitosan                       | 3 | 3.531 |
| Chitosan                       | 3 | 1.080 | Chitosan                       | 3 | 3.850 |
| Chitosan                       | 3 | 1.136 | Chitosan                       | 3 | 3.821 |
| K <sub>2</sub> SO <sub>4</sub> | 3 | 1.881 | K <sub>2</sub> SO <sub>4</sub> | 3 | 2.855 |
| K <sub>2</sub> SO <sub>4</sub> | 3 | 1.954 | K <sub>2</sub> SO <sub>4</sub> | 3 | 2.745 |
| K <sub>2</sub> SO <sub>4</sub> | 3 | 2.062 | K <sub>2</sub> SO <sub>4</sub> | 3 | 2.698 |
| Control                        | 4 | 2.101 | Control                        | 4 | 4.144 |
| Control                        | 4 | 2.029 | Control                        | 4 | 4.212 |
| Control                        | 4 | 2.205 | Control                        | 4 | 4.254 |
| Citric Acid                    | 4 | 2.987 | Citric Acid                    | 4 | 4.874 |
| Citric Acid                    | 4 | 3.032 | Citric Acid                    | 4 | 4.590 |
| Citric Acid                    | 4 | 3.033 | Citric Acid                    | 4 | 4.798 |
| MeJa                           | 4 | 2.658 | MeJa                           | 4 | 3.321 |
| MeJa                           | 4 | 2.443 | MeJa                           | 4 | 3.476 |
| MeJa                           | 4 | 2.581 | MeJa                           | 4 | 3.276 |
| Chitosan                       | 4 | 1.349 | Chitosan                       | 4 | 4.349 |

|                                |   |       |                                |   |       |
|--------------------------------|---|-------|--------------------------------|---|-------|
| Chitosan                       | 4 | 1.657 | Chitosan                       | 4 | 4.235 |
| Chitosan                       | 4 | 1.232 | Chitosan                       | 4 | 4.182 |
| K <sub>2</sub> SO <sub>4</sub> | 4 | 2.864 | K <sub>2</sub> SO <sub>4</sub> | 4 | 3.021 |
| K <sub>2</sub> SO <sub>4</sub> | 4 | 2.965 | K <sub>2</sub> SO <sub>4</sub> | 4 | 2.987 |
| K <sub>2</sub> SO <sub>4</sub> | 4 | 2.732 | K <sub>2</sub> SO <sub>4</sub> | 4 | 3.210 |
| Control                        | 5 | 5.657 | Control                        | 5 | 4.550 |
| Control                        | 5 | 5.788 | Control                        | 5 | 4.412 |
| Control                        | 5 | 5.667 | Control                        | 5 | 4.355 |
| Citric Acid                    | 5 | 3.565 | Citric Acid                    | 5 | 5.237 |
| Citric Acid                    | 5 | 3.451 | Citric Acid                    | 5 | 5.197 |
| Citric Acid                    | 5 | 3.478 | Citric Acid                    | 5 | 5.403 |
| MeJa                           | 5 | 3.265 | MeJa                           | 5 | 3.876 |
| MeJa                           | 5 | 3.850 | MeJa                           | 5 | 4.061 |
| MeJa                           | 5 | 3.002 | MeJa                           | 5 | 5.609 |
| Chitosan                       | 5 | 2.737 | Chitosan                       | 5 | 5.737 |
| Chitosan                       | 5 | 2.570 | Chitosan                       | 5 | 5.490 |
| Chitosan                       | 5 | 2.593 | Chitosan                       | 5 | 5.609 |
| K <sub>2</sub> SO <sub>4</sub> | 5 | 3.324 | K <sub>2</sub> SO <sub>4</sub> | 5 | 3.230 |
| K <sub>2</sub> SO <sub>4</sub> | 5 | 3.012 | K <sub>2</sub> SO <sub>4</sub> | 5 | 3.451 |
| K <sub>2</sub> SO <sub>4</sub> | 5 | 3.265 | K <sub>2</sub> SO <sub>4</sub> | 5 | 3.822 |
| Control                        | 6 | 5.855 | Control                        | 6 | 4.744 |
| Control                        | 6 | 5.798 | Control                        | 6 | 4.656 |
| Control                        | 6 | 5.874 | Control                        | 6 | 4.612 |
| Citric Acid                    | 6 | 3.955 | Citric Acid                    | 6 | 5.237 |
| Citric Acid                    | 6 | 3.987 | Citric Acid                    | 6 | 5.391 |
| Citric Acid                    | 6 | 4.004 | Citric Acid                    | 6 | 5.253 |
| MeJa                           | 6 | 3.754 | MeJa                           | 6 | 4.365 |
| MeJa                           | 6 | 3.633 | MeJa                           | 6 | 4.474 |
| MeJa                           | 6 | 3.486 | MeJa                           | 6 | 4.371 |
| Chitosan                       | 6 | 3.051 | Chitosan                       | 6 | 6.351 |
| Chitosan                       | 6 | 3.455 | Chitosan                       | 6 | 6.699 |
| Chitosan                       | 6 | 3.045 | Chitosan                       | 6 | 6.598 |
| K <sub>2</sub> SO <sub>4</sub> | 6 | 3.874 | K <sub>2</sub> SO <sub>4</sub> | 6 | 3.633 |
| K <sub>2</sub> SO <sub>4</sub> | 6 | 3.532 | K <sub>2</sub> SO <sub>4</sub> | 6 | 3.766 |
| K <sub>2</sub> SO <sub>4</sub> | 6 | 3.724 | K <sub>2</sub> SO <sub>4</sub> | 6 | 3.644 |
| Control                        | 7 | 6.022 | Control                        | 7 | 4.832 |
| Control                        | 7 | 6.012 | Control                        | 7 | 4.988 |
| Control                        | 7 | 6.212 | Control                        | 7 | 4.798 |
| Citric Acid                    | 7 | 5.251 | Citric Acid                    | 7 | 6.265 |
| Citric Acid                    | 7 | 5.487 | Citric Acid                    | 7 | 6.312 |
| Citric Acid                    | 7 | 5.368 | Citric Acid                    | 7 | 6.213 |

|                                |   |       |                                |   |       |
|--------------------------------|---|-------|--------------------------------|---|-------|
| MeJa                           | 7 | 4.076 | MeJa                           | 7 | 4.620 |
| MeJa                           | 7 | 3.965 | MeJa                           | 7 | 4.590 |
| MeJa                           | 7 | 4.130 | MeJa                           | 7 | 4.723 |
| Chitosan                       | 7 | 4.745 | Chitosan                       | 7 | 7.100 |
| Chitosan                       | 7 | 4.854 | Chitosan                       | 7 | 7.021 |
| Chitosan                       | 7 | 4.733 | Chitosan                       | 7 | 7.189 |
| K <sub>2</sub> SO <sub>4</sub> | 7 | 4.462 | K <sub>2</sub> SO <sub>4</sub> | 7 | 4.586 |
| K <sub>2</sub> SO <sub>4</sub> | 7 | 4.168 | K <sub>2</sub> SO <sub>4</sub> | 7 | 4.590 |
| K <sub>2</sub> SO <sub>4</sub> | 7 | 4.356 | K <sub>2</sub> SO <sub>4</sub> | 7 | 4.638 |

*Wild radish*

| 20°C                           |     |                     | 28°C                           |     |                     |
|--------------------------------|-----|---------------------|--------------------------------|-----|---------------------|
| Elicitor                       | Day | Radicle length (cm) | Elicitor                       | Day | Radicle length (cm) |
| Control                        | 1   | 0.682               | Control                        | 1   | 1.255               |
| Control                        | 1   | 0.533               | Control                        | 1   | 1.124               |
| Control                        | 1   | 0.781               | Control                        | 1   | 1.036               |
| Citric Acid                    | 1   | 0.570               | Citric Acid                    | 1   | 1.254               |
| Citric Acid                    | 1   | 0.426               | Citric Acid                    | 1   | 1.152               |
| Citric Acid                    | 1   | 0.391               | Citric Acid                    | 1   | 1.332               |
| MeJa                           | 1   | 0.532               | MeJa                           | 1   | 0.643               |
| MeJa                           | 1   | 0.607               | MeJa                           | 1   | 0.446               |
| MeJa                           | 1   | 0.589               | MeJa                           | 1   | 0.564               |
| Chitosan                       | 1   | 0.376               | Chitosan                       | 1   | 0.556               |
| Chitosan                       | 1   | 0.489               | Chitosan                       | 1   | 0.577               |
| Chitosan                       | 1   | 0.408               | Chitosan                       | 1   | 0.699               |
| K <sub>2</sub> SO <sub>4</sub> | 1   | 0.432               | K <sub>2</sub> SO <sub>4</sub> | 1   | 0.644               |
| K <sub>2</sub> SO <sub>4</sub> | 1   | 0.656               | K <sub>2</sub> SO <sub>4</sub> | 1   | 0.555               |
| K <sub>2</sub> SO <sub>4</sub> | 1   | 0.533               | K <sub>2</sub> SO <sub>4</sub> | 1   | 0.421               |
| Control                        | 2   | 0.529               | Control                        | 2   | 2.765               |
| Control                        | 2   | 1.274               | Control                        | 2   | 2.845               |
| Control                        | 2   | 1.002               | Control                        | 2   | 2.754               |
| Citric Acid                    | 2   | 0.898               | Citric Acid                    | 2   | 2.623               |
| Citric Acid                    | 2   | 0.973               | Citric Acid                    | 2   | 2.565               |
| Citric Acid                    | 2   | 0.002               | Citric Acid                    | 2   | 2.632               |
| MeJa                           | 2   | 1.484               | MeJa                           | 2   | 1.164               |
| MeJa                           | 2   | 1.232               | MeJa                           | 2   | 1.258               |
| MeJa                           | 2   | 1.550               | MeJa                           | 2   | 1.160               |
| Chitosan                       | 2   | 0.854               | Chitosan                       | 2   | 1.033               |
| Chitosan                       | 2   | 0.837               | Chitosan                       | 2   | 1.237               |
| Chitosan                       | 2   | 0.672               | Chitosan                       | 2   | 1.261               |

|                                |   |       |                                |   |       |
|--------------------------------|---|-------|--------------------------------|---|-------|
| K <sub>2</sub> SO <sub>4</sub> | 2 | 0.883 | K <sub>2</sub> SO <sub>4</sub> | 2 | 1.895 |
| K <sub>2</sub> SO <sub>4</sub> | 2 | 1.244 | K <sub>2</sub> SO <sub>4</sub> | 2 | 1.488 |
| K <sub>2</sub> SO <sub>4</sub> | 2 | 1.105 | K <sub>2</sub> SO <sub>4</sub> | 2 | 1.633 |
| Control                        | 3 | 1.780 | Control                        | 3 | 3.012 |
| Control                        | 3 | 1.850 | Control                        | 3 | 3.324 |
| Control                        | 3 | 1.736 | Control                        | 3 | 3.114 |
| Citric Acid                    | 3 | 1.333 | Citric Acid                    | 3 | 2.842 |
| Citric Acid                    | 3 | 1.243 | Citric Acid                    | 3 | 2.763 |
| Citric Acid                    | 3 | 2.048 | Citric Acid                    | 3 | 2.852 |
| MeJa                           | 3 | 1.667 | MeJa                           | 3 | 2.878 |
| MeJa                           | 3 | 1.720 | MeJa                           | 3 | 2.682 |
| MeJa                           | 3 | 1.721 | MeJa                           | 3 | 2.512 |
| Chitosan                       | 3 | 1.032 | Chitosan                       | 3 | 2.791 |
| Chitosan                       | 3 | 1.281 | Chitosan                       | 3 | 2.882 |
| Chitosan                       | 3 | 1.273 | Chitosan                       | 3 | 2.755 |
| K <sub>2</sub> SO <sub>4</sub> | 3 | 1.783 | K <sub>2</sub> SO <sub>4</sub> | 3 | 2.612 |
| K <sub>2</sub> SO <sub>4</sub> | 3 | 1.555 | K <sub>2</sub> SO <sub>4</sub> | 3 | 2.845 |
| K <sub>2</sub> SO <sub>4</sub> | 3 | 1.305 | K <sub>2</sub> SO <sub>4</sub> | 3 | 2.780 |
| Control                        | 4 | 2.773 | Control                        | 4 | 4.966 |
| Control                        | 4 | 2.550 | Control                        | 4 | 5.021 |
| Control                        | 4 | 2.636 | Control                        | 4 | 5.111 |
| Citric Acid                    | 4 | 2.435 | Citric Acid                    | 4 | 4.874 |
| Citric Acid                    | 4 | 2.051 | Citric Acid                    | 4 | 4.712 |
| Citric Acid                    | 4 | 2.683 | Citric Acid                    | 4 | 4.764 |
| MeJa                           | 4 | 1.918 | MeJa                           | 4 | 3.320 |
| MeJa                           | 4 | 2.319 | MeJa                           | 4 | 3.112 |
| MeJa                           | 4 | 2.088 | MeJa                           | 4 | 3.212 |
| Chitosan                       | 4 | 1.667 | Chitosan                       | 4 | 4.225 |
| Chitosan                       | 4 | 1.863 | Chitosan                       | 4 | 4.256 |
| Chitosan                       | 4 | 1.960 | Chitosan                       | 4 | 4.087 |
| K <sub>2</sub> SO <sub>4</sub> | 4 | 2.164 | K <sub>2</sub> SO <sub>4</sub> | 4 | 3.114 |
| K <sub>2</sub> SO <sub>4</sub> | 4 | 1.883 | K <sub>2</sub> SO <sub>4</sub> | 4 | 3.247 |
| K <sub>2</sub> SO <sub>4</sub> | 4 | 2.453 | K <sub>2</sub> SO <sub>4</sub> | 4 | 3.304 |
| Control                        | 5 | 4.970 | Control                        | 5 | 6.020 |
| Control                        | 5 | 4.863 | Control                        | 5 | 5.988 |
| Control                        | 5 | 4.655 | Control                        | 5 | 6.140 |
| Citric Acid                    | 5 | 3.677 | Citric Acid                    | 5 | 5.237 |
| Citric Acid                    | 5 | 4.054 | Citric Acid                    | 5 | 5.343 |
| Citric Acid                    | 5 | 3.954 | Citric Acid                    | 5 | 5.454 |
| MeJa                           | 5 | 2.204 | MeJa                           | 5 | 3.822 |
| MeJa                           | 5 | 2.372 | MeJa                           | 5 | 3.756 |

|                                |   |       |                                |   |       |
|--------------------------------|---|-------|--------------------------------|---|-------|
| MeJa                           | 5 | 2.502 | MeJa                           | 5 | 3.732 |
| Chitosan                       | 5 | 2.662 | Chitosan                       | 5 | 4.500 |
| Chitosan                       | 5 | 2.722 | Chitosan                       | 5 | 4.471 |
| Chitosan                       | 5 | 2.836 | Chitosan                       | 5 | 4.572 |
| K <sub>2</sub> SO <sub>4</sub> | 5 | 2.643 | K <sub>2</sub> SO <sub>4</sub> | 5 | 3.547 |
| K <sub>2</sub> SO <sub>4</sub> | 5 | 2.722 | K <sub>2</sub> SO <sub>4</sub> | 5 | 3.805 |
| K <sub>2</sub> SO <sub>4</sub> | 5 | 2.665 | K <sub>2</sub> SO <sub>4</sub> | 5 | 3.845 |
| Control                        | 6 | 5.044 | Control                        | 6 | 6.647 |
| Control                        | 6 | 5.112 | Control                        | 6 | 6.487 |
| Control                        | 6 | 4.988 | Control                        | 6 | 6.544 |
| Citric Acid                    | 6 | 5.872 | Citric Acid                    | 6 | 5.621 |
| Citric Acid                    | 6 | 5.502 | Citric Acid                    | 6 | 5.532 |
| Citric Acid                    | 6 | 5.633 | Citric Acid                    | 6 | 5.843 |
| MeJa                           | 6 | 2.598 | MeJa                           | 6 | 4.212 |
| MeJa                           | 6 | 2.632 | MeJa                           | 6 | 4.418 |
| MeJa                           | 6 | 2.754 | MeJa                           | 6 | 4.271 |
| Chitosan                       | 6 | 3.154 | Chitosan                       | 6 | 5.781 |
| Chitosan                       | 6 | 3.002 | Chitosan                       | 6 | 5.612 |
| Chitosan                       | 6 | 3.040 | Chitosan                       | 6 | 5.589 |
| K <sub>2</sub> SO <sub>4</sub> | 6 | 3.354 | K <sub>2</sub> SO <sub>4</sub> | 6 | 3.877 |
| K <sub>2</sub> SO <sub>4</sub> | 6 | 3.754 | K <sub>2</sub> SO <sub>4</sub> | 6 | 4.405 |
| K <sub>2</sub> SO <sub>4</sub> | 6 | 3.565 | K <sub>2</sub> SO <sub>4</sub> | 6 | 4.134 |
| Control                        | 7 | 5.422 | Control                        | 7 | 7.210 |
| Control                        | 7 | 5.390 | Control                        | 7 | 7.221 |
| Control                        | 7 | 5.530 | Control                        | 7 | 7.321 |
| Citric Acid                    | 7 | 6.207 | Citric Acid                    | 7 | 6.471 |
| Citric Acid                    | 7 | 6.306 | Citric Acid                    | 7 | 6.512 |
| Citric Acid                    | 7 | 6.336 | Citric Acid                    | 7 | 6.321 |
| MeJa                           | 7 | 3.473 | MeJa                           | 7 | 4.787 |
| MeJa                           | 7 | 3.235 | MeJa                           | 7 | 4.634 |
| MeJa                           | 7 | 3.029 | MeJa                           | 7 | 4.834 |
| Chitosan                       | 7 | 4.814 | Chitosan                       | 7 | 7.665 |
| Chitosan                       | 7 | 4.960 | Chitosan                       | 7 | 7.726 |
| Chitosan                       | 7 | 5.051 | Chitosan                       | 7 | 7.764 |
| K <sub>2</sub> SO <sub>4</sub> | 7 | 4.332 | K <sub>2</sub> SO <sub>4</sub> | 7 | 5.760 |
| K <sub>2</sub> SO <sub>4</sub> | 7 | 4.464 | K <sub>2</sub> SO <sub>4</sub> | 7 | 5.531 |
| K <sub>2</sub> SO <sub>4</sub> | 7 | 4.212 | K <sub>2</sub> SO <sub>4</sub> | 7 | 4.620 |

**Table S2.** Desarrollo del hipocótilo en brotes de Rábano comestible y Rábano silvestre durante 7 días de brotación.

| Edible radish                  |     |                       |                                |     |                       |
|--------------------------------|-----|-----------------------|--------------------------------|-----|-----------------------|
| 20°C                           |     |                       | 28°C                           |     |                       |
| Elicitor                       | Day | Hypocotyl length (cm) | Elicitor                       | Day | Hypocotyl length (cm) |
| Control                        | 1   | 0                     | Control                        | 1   | 0                     |
| Control                        | 1   | 0                     | Control                        | 1   | 0                     |
| Control                        | 1   | 0                     | Control                        | 1   | 0                     |
| Citric Acid                    | 1   | 0                     | Citric Acid                    | 1   | 0                     |
| Citric Acid                    | 1   | 0                     | Citric Acid                    | 1   | 0                     |
| Citric Acid                    | 1   | 0                     | Citric Acid                    | 1   | 0                     |
| MeJa                           | 1   | 0                     | MeJa                           | 1   | 0                     |
| MeJa                           | 1   | 0                     | MeJa                           | 1   | 0                     |
| MeJa                           | 1   | 0                     | MeJa                           | 1   | 0                     |
| Chitosan                       | 1   | 0                     | Chitosan                       | 1   | 0                     |
| Chitosan                       | 1   | 0                     | Chitosan                       | 1   | 0                     |
| Chitosan                       | 1   | 0                     | Chitosan                       | 1   | 0                     |
| K <sub>2</sub> SO <sub>4</sub> | 1   | 0                     | K <sub>2</sub> SO <sub>4</sub> | 1   | 0                     |
| K <sub>2</sub> SO <sub>4</sub> | 1   | 0                     | K <sub>2</sub> SO <sub>4</sub> | 1   | 0                     |
| K <sub>2</sub> SO <sub>4</sub> | 1   | 0                     | K <sub>2</sub> SO <sub>4</sub> | 1   | 0                     |
| Control                        | 2   | 0.602                 | Control                        | 2   | 0.850                 |
| Control                        | 2   | 0.707                 | Control                        | 2   | 0.865                 |
| Control                        | 2   | 0.556                 | Control                        | 2   | 0.843                 |
| Citric Acid                    | 2   | 0.563                 | Citric Acid                    | 2   | 0.927                 |
| Citric Acid                    | 2   | 0.482                 | Citric Acid                    | 2   | 0.692                 |
| Citric Acid                    | 2   | 0.550                 | Citric Acid                    | 2   | 0.817                 |
| MeJa                           | 2   | 0.519                 | MeJa                           | 2   | 0.634                 |
| MeJa                           | 2   | 0.627                 | MeJa                           | 2   | 0.613                 |
| MeJa                           | 2   | 0.733                 | MeJa                           | 2   | 0.648                 |
| Chitosan                       | 2   | 0.713                 | Chitosan                       | 2   | 0.550                 |
| Chitosan                       | 2   | 0.742                 | Chitosan                       | 2   | 0.558                 |
| Chitosan                       | 2   | 0.683                 | Chitosan                       | 2   | 0.633                 |
| K <sub>2</sub> SO <sub>4</sub> | 2   | 0.398                 | K <sub>2</sub> SO <sub>4</sub> | 2   | 0.612                 |
| K <sub>2</sub> SO <sub>4</sub> | 2   | 0.724                 | K <sub>2</sub> SO <sub>4</sub> | 2   | 0.787                 |
| K <sub>2</sub> SO <sub>4</sub> | 2   | 0.633                 | K <sub>2</sub> SO <sub>4</sub> | 2   | 0.888                 |
| Control                        | 3   | 0.981                 | Control                        | 3   | 1.020                 |
| Control                        | 3   | 1.003                 | Control                        | 3   | 1.109                 |
| Control                        | 3   | 0.906                 | Control                        | 3   | 1.043                 |
| Citric Acid                    | 3   | 1.132                 | Citric Acid                    | 3   | 1.194                 |
| Citric Acid                    | 3   | 1.273                 | Citric Acid                    | 3   | 1.292                 |

|                                |   |       |                                |   |       |
|--------------------------------|---|-------|--------------------------------|---|-------|
| Citric Acid                    | 3 | 1.383 | Citric Acid                    | 3 | 1.371 |
| MeJa                           | 3 | 0.833 | MeJa                           | 3 | 1.182 |
| MeJa                           | 3 | 0.779 | MeJa                           | 3 | 1.061 |
| MeJa                           | 3 | 0.681 | MeJa                           | 3 | 0.921 |
| Chitosan                       | 3 | 1.233 | Chitosan                       | 3 | 1.891 |
| Chitosan                       | 3 | 1.102 | Chitosan                       | 3 | 1.783 |
| Chitosan                       | 3 | 1.038 | Chitosan                       | 3 | 1.955 |
| K <sub>2</sub> SO <sub>4</sub> | 3 | 1.005 | K <sub>2</sub> SO <sub>4</sub> | 3 | 1.176 |
| K <sub>2</sub> SO <sub>4</sub> | 3 | 1.002 | K <sub>2</sub> SO <sub>4</sub> | 3 | 1.065 |
| K <sub>2</sub> SO <sub>4</sub> | 3 | 0.881 | K <sub>2</sub> SO <sub>4</sub> | 3 | 1.186 |
| Control                        | 4 | 1.473 | Control                        | 4 | 1.303 |
| Control                        | 4 | 1.632 | Control                        | 4 | 1.275 |
| Control                        | 4 | 1.344 | Control                        | 4 | 1.321 |
| Citric Acid                    | 4 | 1.614 | Citric Acid                    | 4 | 1.944 |
| Citric Acid                    | 4 | 1.806 | Citric Acid                    | 4 | 1.954 |
| Citric Acid                    | 4 | 1.432 | Citric Acid                    | 4 | 2.191 |
| MeJa                           | 4 | 1.400 | MeJa                           | 4 | 1.375 |
| MeJa                           | 4 | 1.139 | MeJa                           | 4 | 1.252 |
| MeJa                           | 4 | 1.437 | MeJa                           | 4 | 1.309 |
| Chitosan                       | 4 | 1.716 | Chitosan                       | 4 | 2.572 |
| Chitosan                       | 4 | 1.694 | Chitosan                       | 4 | 1.954 |
| Chitosan                       | 4 | 1.718 | Chitosan                       | 4 | 2.201 |
| K <sub>2</sub> SO <sub>4</sub> | 4 | 1.636 | K <sub>2</sub> SO <sub>4</sub> | 4 | 2.082 |
| K <sub>2</sub> SO <sub>4</sub> | 4 | 1.226 | K <sub>2</sub> SO <sub>4</sub> | 4 | 1.912 |
| K <sub>2</sub> SO <sub>4</sub> | 4 | 1.476 | K <sub>2</sub> SO <sub>4</sub> | 4 | 1.823 |
| Control                        | 5 | 1.746 | Control                        | 5 | 1.531 |
| Control                        | 5 | 1.806 | Control                        | 5 | 1.465 |
| Control                        | 5 | 1.788 | Control                        | 5 | 1.554 |
| Citric Acid                    | 5 | 1.790 | Citric Acid                    | 5 | 2.459 |
| Citric Acid                    | 5 | 2.012 | Citric Acid                    | 5 | 2.376 |
| Citric Acid                    | 5 | 2.213 | Citric Acid                    | 5 | 2.297 |
| MeJa                           | 5 | 1.773 | MeJa                           | 5 | 1.506 |
| MeJa                           | 5 | 1.622 | MeJa                           | 5 | 1.481 |
| MeJa                           | 5 | 1.767 | MeJa                           | 5 | 1.372 |
| Chitosan                       | 5 | 1.919 | Chitosan                       | 5 | 2.408 |
| Chitosan                       | 5 | 1.987 | Chitosan                       | 5 | 2.284 |
| Chitosan                       | 5 | 1.847 | Chitosan                       | 5 | 2.668 |
| K <sub>2</sub> SO <sub>4</sub> | 5 | 1.858 | K <sub>2</sub> SO <sub>4</sub> | 5 | 2.224 |
| K <sub>2</sub> SO <sub>4</sub> | 5 | 1.953 | K <sub>2</sub> SO <sub>4</sub> | 5 | 2.186 |
| K <sub>2</sub> SO <sub>4</sub> | 5 | 1.973 | K <sub>2</sub> SO <sub>4</sub> | 5 | 2.246 |
| Control                        | 6 | 1.854 | Control                        | 6 | 2.364 |



|                                |   |       |                                |   |       |
|--------------------------------|---|-------|--------------------------------|---|-------|
| Control                        | 6 | 1.901 | Control                        | 6 | 2.298 |
| Control                        | 6 | 1.835 | Control                        | 6 | 2.325 |
| Citric Acid                    | 6 | 2.107 | Citric Acid                    | 6 | 2.587 |
| Citric Acid                    | 6 | 2.022 | Citric Acid                    | 6 | 2.501 |
| Citric Acid                    | 6 | 1.988 | Citric Acid                    | 6 | 2.482 |
| MeJa                           | 6 | 1.797 | MeJa                           | 6 | 2.024 |
| MeJa                           | 6 | 1.800 | MeJa                           | 6 | 2.192 |
| MeJa                           | 6 | 1.847 | MeJa                           | 6 | 1.871 |
| Chitosan                       | 6 | 2.238 | Chitosan                       | 6 | 3.425 |
| Chitosan                       | 6 | 2.355 | Chitosan                       | 6 | 3.245 |
| Chitosan                       | 6 | 2.203 | Chitosan                       | 6 | 2.944 |
| K <sub>2</sub> SO <sub>4</sub> | 6 | 2.221 | K <sub>2</sub> SO <sub>4</sub> | 6 | 2.364 |
| K <sub>2</sub> SO <sub>4</sub> | 6 | 2.398 | K <sub>2</sub> SO <sub>4</sub> | 6 | 2.361 |
| K <sub>2</sub> SO <sub>4</sub> | 6 | 2.432 | K <sub>2</sub> SO <sub>4</sub> | 6 | 2.321 |
| Control                        | 7 | 2.099 | Control                        | 7 | 2.507 |
| Control                        | 7 | 1.978 | Control                        | 7 | 2.413 |
| Control                        | 7 | 2.086 | Control                        | 7 | 2.402 |
| Citric Acid                    | 7 | 2.109 | Citric Acid                    | 7 | 2.684 |
| Citric Acid                    | 7 | 2.552 | Citric Acid                    | 7 | 2.721 |
| Citric Acid                    | 7 | 2.077 | Citric Acid                    | 7 | 2.697 |
| MeJa                           | 7 | 1.844 | MeJa                           | 7 | 2.232 |
| MeJa                           | 7 | 2.016 | MeJa                           | 7 | 2.354 |
| MeJa                           | 7 | 1.918 | MeJa                           | 7 | 2.198 |
| Chitosan                       | 7 | 2.304 | Chitosan                       | 7 | 4.067 |
| Chitosan                       | 7 | 2.115 | Chitosan                       | 7 | 4.082 |
| Chitosan                       | 7 | 2.232 | Chitosan                       | 7 | 4.061 |
| K <sub>2</sub> SO <sub>4</sub> | 7 | 2.653 | K <sub>2</sub> SO <sub>4</sub> | 7 | 2.507 |
| K <sub>2</sub> SO <sub>4</sub> | 7 | 2.632 | K <sub>2</sub> SO <sub>4</sub> | 7 | 2.413 |
| K <sub>2</sub> SO <sub>4</sub> | 7 | 2.707 | K <sub>2</sub> SO <sub>4</sub> | 7 | 2.321 |

| Wild radish |     |                       |             |     |                       |
|-------------|-----|-----------------------|-------------|-----|-----------------------|
| 20°C        |     |                       | 28°C        |     |                       |
| Elicitor    | Day | Hypocotyl length (cm) | Elicitor    | Day | Hypocotyl length (cm) |
| Control     | 1   | 0                     | Control     | 1   | 0                     |
| Control     | 1   | 0                     | Control     | 1   | 0                     |
| Control     | 1   | 0                     | Control     | 1   | 0                     |
| Citric Acid | 1   | 0                     | Citric Acid | 1   | 0                     |
| Citric Acid | 1   | 0                     | Citric Acid | 1   | 0                     |
| Citric Acid | 1   | 0                     | Citric Acid | 1   | 0                     |
| MeJa        | 1   | 0                     | MeJa        | 1   | 0                     |

|                                |   |       |                                |   |       |
|--------------------------------|---|-------|--------------------------------|---|-------|
| MeJa                           | 1 | 0     | MeJa                           | 1 | 0     |
| MeJa                           | 1 | 0     | MeJa                           | 1 | 0     |
| Chitosan                       | 1 | 0     | Chitosan                       | 1 | 0     |
| Chitosan                       | 1 | 0     | Chitosan                       | 1 | 0     |
| Chitosan                       | 1 | 0     | Chitosan                       | 1 | 0     |
| K <sub>2</sub> SO <sub>4</sub> | 1 | 0     | K <sub>2</sub> SO <sub>4</sub> | 1 | 0     |
| K <sub>2</sub> SO <sub>4</sub> | 1 | 0     | K <sub>2</sub> SO <sub>4</sub> | 1 | 0     |
| K <sub>2</sub> SO <sub>4</sub> | 1 | 0     | K <sub>2</sub> SO <sub>4</sub> | 1 | 0     |
| Control                        | 2 | 0.592 | Control                        | 2 | 0.522 |
| Control                        | 2 | 0.489 | Control                        | 2 | 0.402 |
| Control                        | 2 | 0.532 | Control                        | 2 | 0.586 |
| Citric Acid                    | 2 | 0.771 | Citric Acid                    | 2 | 0.395 |
| Citric Acid                    | 2 | 0.848 | Citric Acid                    | 2 | 0.794 |
| Citric Acid                    | 2 | 0.852 | Citric Acid                    | 2 | 0.817 |
| MeJa                           | 2 | 0.554 | MeJa                           | 2 | 0.710 |
| MeJa                           | 2 | 0.690 | MeJa                           | 2 | 0.361 |
| MeJa                           | 2 | 0.738 | MeJa                           | 2 | 0.519 |
| Chitosan                       | 2 | 0.748 | Chitosan                       | 2 | 1.235 |
| Chitosan                       | 2 | 0.551 | Chitosan                       | 2 | 1.136 |
| Chitosan                       | 2 | 0.633 | Chitosan                       | 2 | 1.156 |
| K <sub>2</sub> SO <sub>4</sub> | 2 | 0.821 | K <sub>2</sub> SO <sub>4</sub> | 2 | 0.545 |
| K <sub>2</sub> SO <sub>4</sub> | 2 | 0.745 | K <sub>2</sub> SO <sub>4</sub> | 2 | 0.702 |
| K <sub>2</sub> SO <sub>4</sub> | 2 | 0.590 | K <sub>2</sub> SO <sub>4</sub> | 2 | 0.586 |
| Control                        | 3 | 0.883 | Control                        | 3 | 1.034 |
| Control                        | 3 | 0.850 | Control                        | 3 | 1.101 |
| Control                        | 3 | 0.905 | Control                        | 3 | 0.943 |
| Citric Acid                    | 3 | 1.232 | Citric Acid                    | 3 | 1.486 |
| Citric Acid                    | 3 | 1.236 | Citric Acid                    | 3 | 1.393 |
| Citric Acid                    | 3 | 1.373 | Citric Acid                    | 3 | 1.290 |
| MeJa                           | 3 | 0.763 | MeJa                           | 3 | 1.283 |
| MeJa                           | 3 | 0.888 | MeJa                           | 3 | 1.261 |
| MeJa                           | 3 | 0.812 | MeJa                           | 3 | 0.971 |
| Chitosan                       | 3 | 1.003 | Chitosan                       | 3 | 1.741 |
| Chitosan                       | 3 | 1.153 | Chitosan                       | 3 | 1.836 |
| Chitosan                       | 3 | 1.033 | Chitosan                       | 3 | 1.905 |
| K <sub>2</sub> SO <sub>4</sub> | 3 | 1.232 | K <sub>2</sub> SO <sub>4</sub> | 3 | 0.932 |
| K <sub>2</sub> SO <sub>4</sub> | 3 | 1.105 | K <sub>2</sub> SO <sub>4</sub> | 3 | 0.891 |
| K <sub>2</sub> SO <sub>4</sub> | 3 | 1.053 | K <sub>2</sub> SO <sub>4</sub> | 3 | 0.876 |
| Control                        | 4 | 1.245 | Control                        | 4 | 1.306 |
| Control                        | 4 | 1.395 | Control                        | 4 | 1.387 |
| Control                        | 4 | 1.230 | Control                        | 4 | 1.421 |

|                                |   |       |                                |   |       |
|--------------------------------|---|-------|--------------------------------|---|-------|
| Citric Acid                    | 4 | 1.971 | Citric Acid                    | 4 | 1.929 |
| Citric Acid                    | 4 | 1.658 | Citric Acid                    | 4 | 1.954 |
| Citric Acid                    | 4 | 1.712 | Citric Acid                    | 4 | 1.886 |
| MeJa                           | 4 | 1.175 | MeJa                           | 4 | 1.381 |
| MeJa                           | 4 | 1.279 | MeJa                           | 4 | 1.283 |
| MeJa                           | 4 | 1.285 | MeJa                           | 4 | 1.454 |
| Chitosan                       | 4 | 1.362 | Chitosan                       | 4 | 2.432 |
| Chitosan                       | 4 | 1.465 | Chitosan                       | 4 | 2.003 |
| Chitosan                       | 4 | 1.315 | Chitosan                       | 4 | 2.321 |
| K <sub>2</sub> SO <sub>4</sub> | 4 | 1.435 | K <sub>2</sub> SO <sub>4</sub> | 4 | 1.286 |
| K <sub>2</sub> SO <sub>4</sub> | 4 | 1.593 | K <sub>2</sub> SO <sub>4</sub> | 4 | 1.386 |
| K <sub>2</sub> SO <sub>4</sub> | 4 | 1.366 | K <sub>2</sub> SO <sub>4</sub> | 4 | 1.575 |
| Control                        | 5 | 1.446 | Control                        | 5 | 1.844 |
| Control                        | 5 | 1.378 | Control                        | 5 | 1.734 |
| Control                        | 5 | 1.507 | Control                        | 5 | 1.898 |
| Citric Acid                    | 5 | 1.678 | Citric Acid                    | 5 | 3.396 |
| Citric Acid                    | 5 | 1.688 | Citric Acid                    | 5 | 3.281 |
| Citric Acid                    | 5 | 1.901 | Citric Acid                    | 5 | 3.100 |
| MeJa                           | 5 | 1.371 | MeJa                           | 5 | 1.783 |
| MeJa                           | 5 | 1.602 | MeJa                           | 5 | 1.682 |
| MeJa                           | 5 | 1.481 | MeJa                           | 5 | 1.752 |
| Chitosan                       | 5 | 1.336 | Chitosan                       | 5 | 2.704 |
| Chitosan                       | 5 | 1.502 | Chitosan                       | 5 | 2.321 |
| Chitosan                       | 5 | 1.515 | Chitosan                       | 5 | 2.486 |
| K <sub>2</sub> SO <sub>4</sub> | 5 | 1.501 | K <sub>2</sub> SO <sub>4</sub> | 5 | 1.864 |
| K <sub>2</sub> SO <sub>4</sub> | 5 | 1.522 | K <sub>2</sub> SO <sub>4</sub> | 5 | 1.712 |
| K <sub>2</sub> SO <sub>4</sub> | 5 | 1.607 | K <sub>2</sub> SO <sub>4</sub> | 5 | 1.738 |
| Control                        | 6 | 1.577 | Control                        | 6 | 2.837 |
| Control                        | 6 | 1.465 | Control                        | 6 | 2.687 |
| Control                        | 6 | 1.597 | Control                        | 6 | 2.754 |
| Citric Acid                    | 6 | 2.107 | Citric Acid                    | 6 | 3.571 |
| Citric Acid                    | 6 | 2.022 | Citric Acid                    | 6 | 3.171 |
| Citric Acid                    | 6 | 1.988 | Citric Acid                    | 6 | 3.482 |
| MeJa                           | 6 | 1.543 | MeJa                           | 6 | 1.865 |
| MeJa                           | 6 | 1.555 | MeJa                           | 6 | 1.852 |
| MeJa                           | 6 | 1.464 | MeJa                           | 6 | 1.901 |
| Chitosan                       | 6 | 1.786 | Chitosan                       | 6 | 2.976 |
| Chitosan                       | 6 | 1.803 | Chitosan                       | 6 | 2.604 |
| Chitosan                       | 6 | 1.899 | Chitosan                       | 6 | 2.792 |
| K <sub>2</sub> SO <sub>4</sub> | 6 | 1.745 | K <sub>2</sub> SO <sub>4</sub> | 6 | 2.032 |
| K <sub>2</sub> SO <sub>4</sub> | 6 | 1.688 | K <sub>2</sub> SO <sub>4</sub> | 6 | 2.344 |

|                                |   |       |                                |   |       |
|--------------------------------|---|-------|--------------------------------|---|-------|
| K <sub>2</sub> SO <sub>4</sub> | 6 | 1.801 | K <sub>2</sub> SO <sub>4</sub> | 6 | 2.176 |
| Control                        | 7 | 1.840 | Control                        | 7 | 3.137 |
| Control                        | 7 | 1.853 | Control                        | 7 | 3.212 |
| Control                        | 7 | 1.760 | Control                        | 7 | 3.253 |
| Citric Acid                    | 7 | 2.485 | Citric Acid                    | 7 | 3.775 |
| Citric Acid                    | 7 | 2.538 | Citric Acid                    | 7 | 3.589 |
| Citric Acid                    | 7 | 2.364 | Citric Acid                    | 7 | 3.597 |
| MeJa                           | 7 | 1.730 | MeJa                           | 7 | 2.882 |
| MeJa                           | 7 | 1.762 | MeJa                           | 7 | 2.791 |
| MeJa                           | 7 | 1.692 | MeJa                           | 7 | 2.940 |
| Chitosan                       | 7 | 2.452 | Chitosan                       | 7 | 4.450 |
| Chitosan                       | 7 | 2.573 | Chitosan                       | 7 | 4.490 |
| Chitosan                       | 7 | 2.607 | Chitosan                       | 7 | 4.360 |
| K <sub>2</sub> SO <sub>4</sub> | 7 | 2.287 | K <sub>2</sub> SO <sub>4</sub> | 7 | 2.995 |
| K <sub>2</sub> SO <sub>4</sub> | 7 | 1.750 | K <sub>2</sub> SO <sub>4</sub> | 7 | 3.188 |
| K <sub>2</sub> SO <sub>4</sub> | 7 | 1.888 | K <sub>2</sub> SO <sub>4</sub> | 7 | 3.086 |

Table S3. Report on Growth and Bioactive Compound Production in 15-Day-Old *Raphanus sativus* Seedlings at 30°C.

| Treatments                         | Length (cm) |         | Dry Weight (g) |          | Total Glucosinolates (mg 100 g <sup>-1</sup> DW) |          | Total Anthocyanins (mg 100 g <sup>-1</sup> DW) |         |
|------------------------------------|-------------|---------|----------------|----------|--------------------------------------------------|----------|------------------------------------------------|---------|
|                                    | Day 7       | Day 15  | Day 7          | Day 15   | Day 7                                            | Day 15   | Day 7                                          | Day 15  |
| <b>Control</b>                     | 2.441cB     | 3.736bA | 4.614cB        | 7.371bA  | 53.441bA                                         | 30.069bB | 3.062bA                                        | 1.667bB |
| <b>Citric Acid</b>                 | 2.701bB     | 3.663bA | 8.088aB        | 11.577aA | 57.996bA                                         | 27.377bB | 2.231bA                                        | 1.318bB |
| <b>MeJa</b>                        | 2.261dB     | 4.159bA | 5.068bcB       | 8.250bA  | 70.791abA                                        | 46.051aB | 5.362aA                                        | 4.073aB |
| <b>Chitosan</b>                    | 4.070aB     | 5.663aA | 7.027abB       | 10.880aA | 66.824abA                                        | 47.817aA | 2.124bA                                        | 0.835bB |
| <b>K<sub>2</sub>SO<sub>4</sub></b> | 2.414cdB    | 3.517bA | 3.521cB        | 7.565bA  | 83.506a A                                        | 58.488aB | 2.192bA                                        | 1.643bB |

Different lower case letters indicate statistically significant differences between treatments. Different capital letters indicate statistically significant differences between days. Mean separation within a column followed by different letters are significantly different according to Tukey test at  $p \leq 0.05$ .

Table S4. Report on Growth and Bioactive Compound Production in 15-Day-Old *Raphanus raphanistrum* Seedlings at 30°C.

| Treatments                         | Length (cm) |         | Dry Weight (g) |          | Total Glucosinolates (mg 100 g <sup>-1</sup> DW) |          | Total Anthocyanins (mg 100 g <sup>-1</sup> DW) |         |
|------------------------------------|-------------|---------|----------------|----------|--------------------------------------------------|----------|------------------------------------------------|---------|
|                                    | Day 7       | Day 15  | Day 7          | Day 15   | Day 7                                            | Day 15   | Day 7                                          | Day 15  |
| <b>Control</b>                     | 3.201cB     | 4.113bA | 1.812cB        | 4.506cA  | 44.818bA                                         | 25.546bB | 3.063bA                                        | 2.144bA |
| <b>Citric Acid</b>                 | 3.654bB     | 4.458bA | 3.357aB        | 7.210aA  | 53.570bA                                         | 30.535bB | 2.424bA                                        | 1.697bB |
| <b>MeJa</b>                        | 2.871dB     | 3.903bA | 2.100bcB       | 5.454bcA | 73.881aA                                         | 42.112aB | 5.362aA                                        | 3.753aB |
| <b>Chitosan</b>                    | 4.433aB     | 5.200aA | 2.872abB       | 6.243bA  | 73.162aA                                         | 41.702aB | 2.124bA                                        | 1.487bA |
| <b>K<sub>2</sub>SO<sub>4</sub></b> | 3.090cdB    | 3.990bA | 2.203bcB       | 5.773bA  | 91.478aA                                         | 52.142aB | 2.192bA                                        | 1.535bB |

Different lower case letters indicate statistically significant differences between treatments. Different capital letters indicate statistically significant differences between days. Mean separation within a column followed by different letters are significantly different according to Tukey test at  $p \leq 0.05$ .

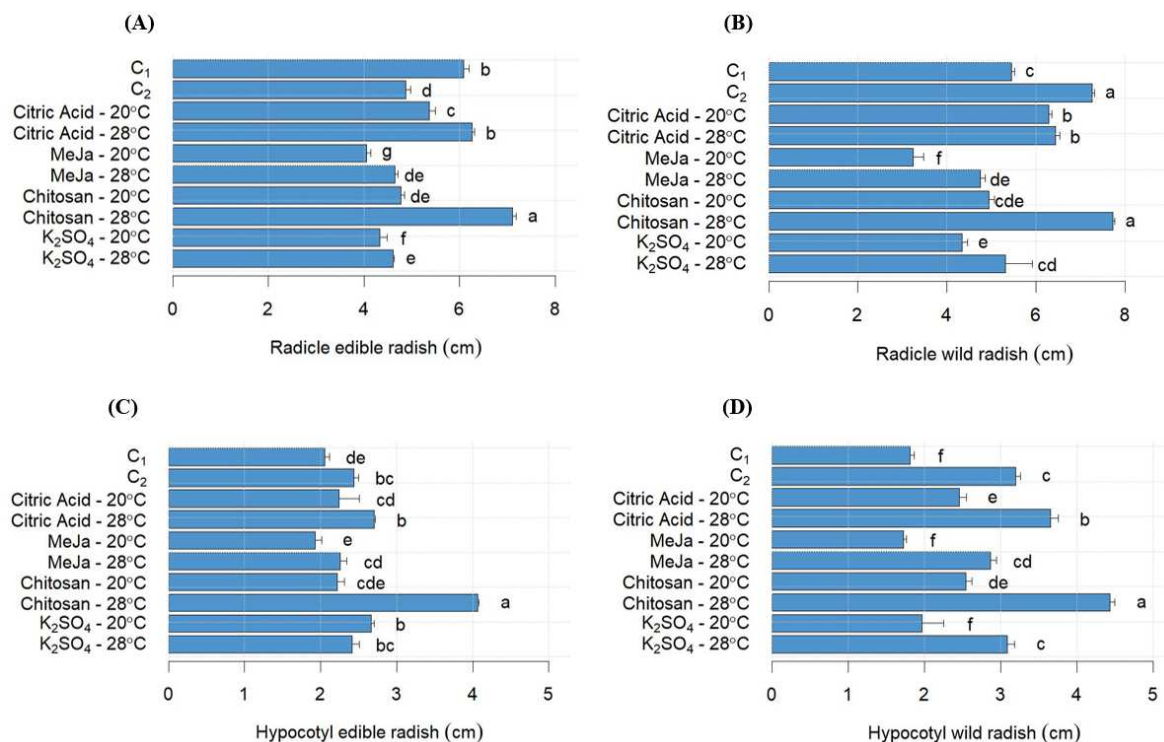

**Figure S1.** Effect of elicitors on radicle growth and hypocotyl growth in 7-day germinated sprouts. Letters A and B represent the Hypocotyl growth of ER and WR, respectively. Letters C and D represent the radicle growth of ER and WR, respectively. C1: Control at 20°C; C2: Control at 30°C; Citric Acid – 20°C represents the citric acid elicitor treatment combined with temperature at 20°C; Citric Acid – 30°C represents the citric acid elicitor treatment combined with temperature at 30°C; MeJa – 20°C represents the MeJa elicitor treatment combined with temperature at 20°C; MeJa – 30°C represents the MeJa elicitor treatment combined with temperature at 30°C; Chitosan – 20°C represents the chitosan elicitor treatment combined with temperature at 20°C; Chitosan – 30°C represents the chitosan elicitor treatment combined with temperature at 30°C; K<sub>2</sub>SO<sub>4</sub> – 20°C represents the sulphate potassium elicitor treatment combined with temperature at 20°C; K<sub>2</sub>SO<sub>4</sub> – 30°C represents the sulphate potassium elicitor treatment combined with temperature at 30°C. Different letters mean significant differences at  $p < 0.05$  in treatments for radish sprouts analyzed separately (edible and wild radish) according to Tukey test.

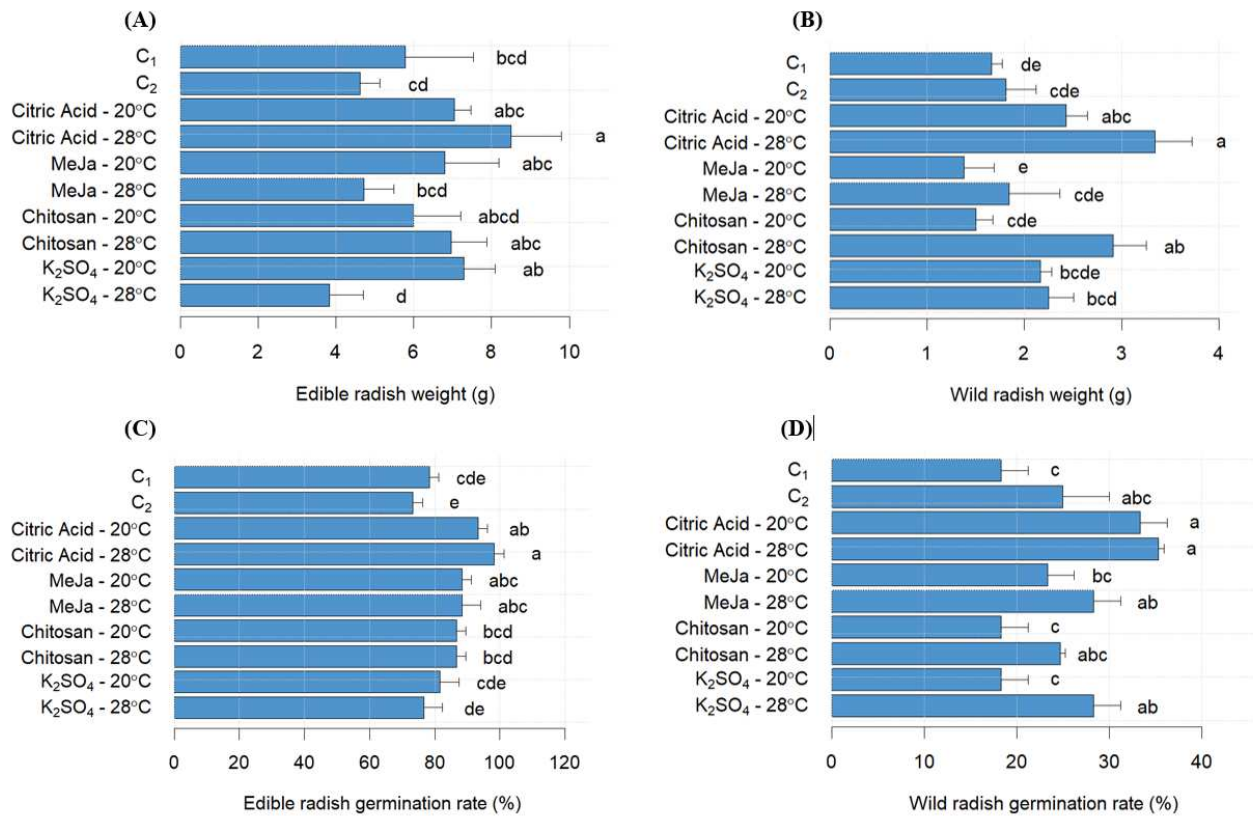

**Figure S2.** Effect of elicitors on fresh weight and germination rate in 7-day germinated sprouts. Letters A and B represent the fresh weight of ER and WR. Letters C and D represent the germination rate of ER and WR. C<sub>1</sub>: Control at 20°C; C<sub>2</sub>: Control at 30°C; Citric Acid – 20°C represents the citric acid elicitor treatment combined with temperature at 20°C; Citric Acid – 30°C represents the citric acid elicitor treatment combined with temperature at 30°C; MeJa – 20°C represents the MeJa elicitor treatment combined with temperature at 20°C; MeJa – 30°C represents the MeJa elicitor treatment combined with temperature at 30°C; Chitosan – 20°C represents the chitosan elicitor treatment combined with temperature at 20°C; Chitosan – 30°C represents the chitosan elicitor treatment combined with temperature at 30°C; K<sub>2</sub>SO<sub>4</sub> – 20°C represents the sulphate potassium elicitor treatment combined with temperature at 20°C; K<sub>2</sub>SO<sub>4</sub> – 30°C represents the sulphate potassium elicitor treatment combined with temperature at 30°C. Different letters mean significant differences at  $p < 0.05$  in treatments for radish sprouts analyzed separately (edible and wild radish) according to Tukey test.

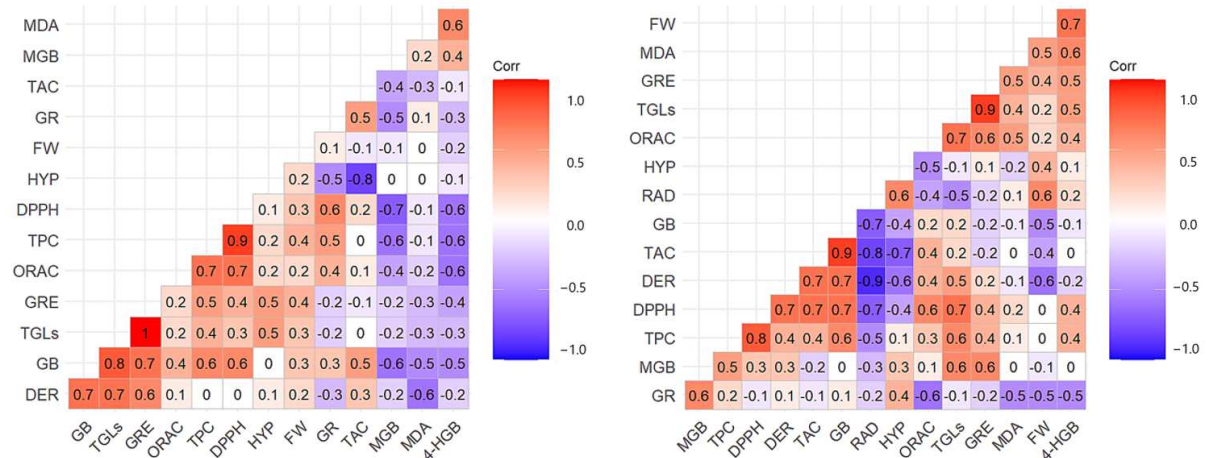

**Figure S3.** Correlation matrix between different variables at 20°C, (A) correspond to ER and (B) correspond to WR.

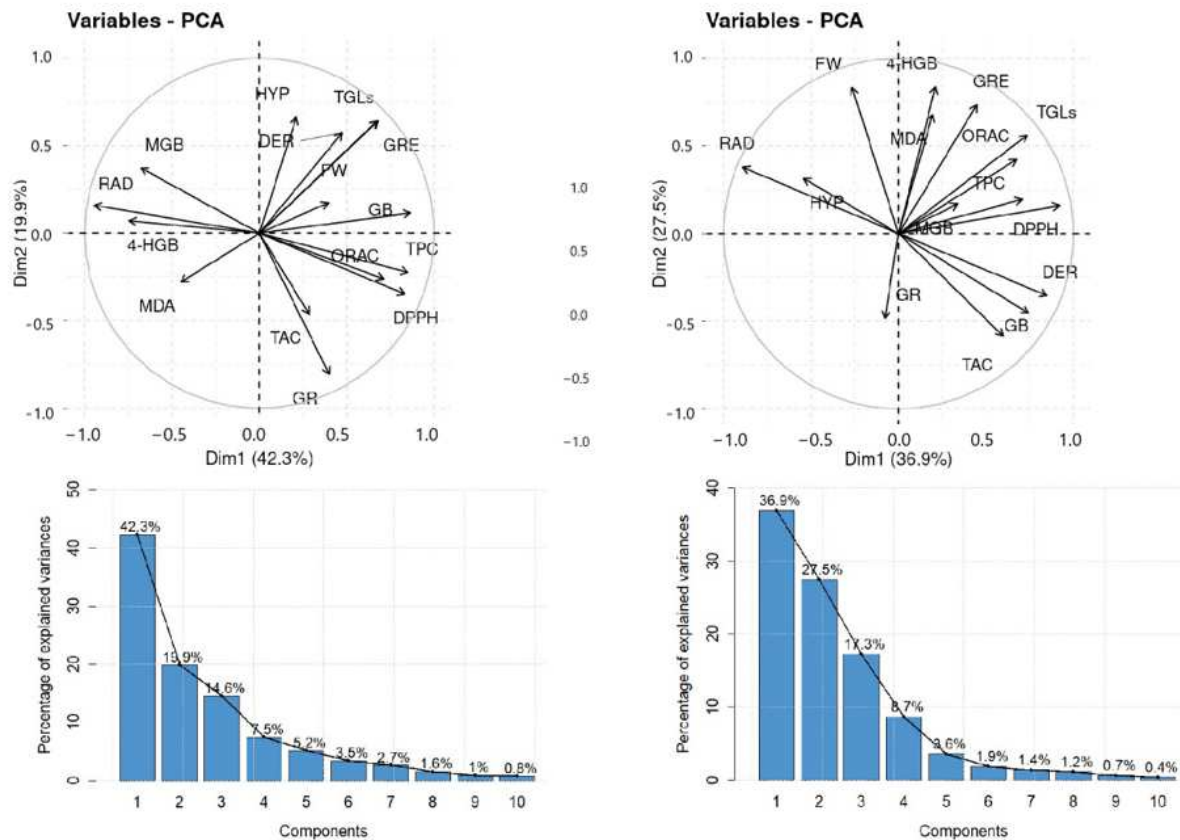

**Figure S4.** Principal component analysis (PCA) at 20°C. Letter (A) represent the PCA of edible radish, letter (B) represent the PCA of wild radish, letter (C) represent the percentage of explained of edible radish and letter (D) represent the percentage of explained of wild radish. RAD: Length of the radicle; HYP: Hypocotyl length, FW: weight sprouts; GR: germination rate; MDA: Malondialdehyde Assay; TGLs: Total Glucosinolates; TAC: Total anthocyanins; GRE: Glucoraphenin; 4-HGB: Hydroxyglucobrassicin; DER: Dehydroerucine; GB: Glucobrassicin; MGB: 4-methoxyglucobrassicin; TPC: Total phenolic content; DPPH: DPPH assay; ORAC: ORAC assay for ER and WR.



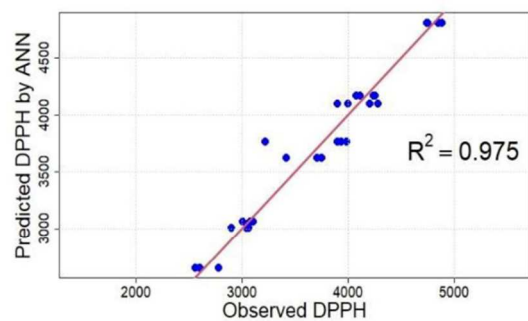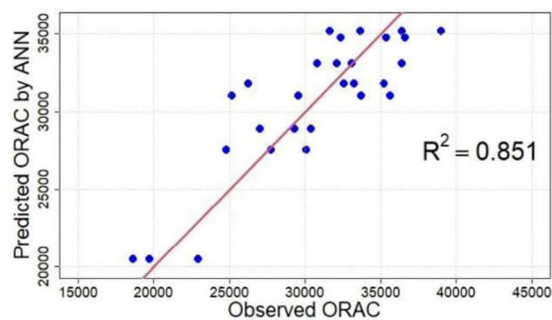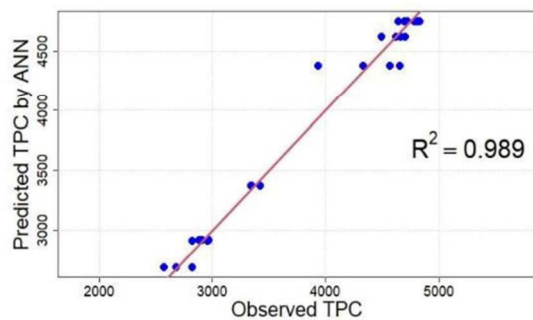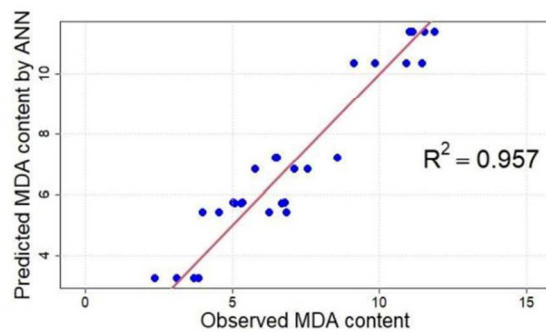

**Figure S5.** Variables predicted by ANNs v/s observed variables for DPPH, ORAC, TPC and MDA.
